# Supplementary material
Source: ML conference proceedings conference paper supplement (https://proceedings.neurips.cc/paper_files/paper/2015/hash/cf67355a3333e6e143439161adc2d82e-Abstract.html)
Supplement: Supplementary file [file cf67355a3333e6e143439161adc2d82e-Supplemental.zip]

## 7 Appendix

### 7.1 Identifiability for Single Subunit Model

**Lemma 1.**  $[\mathbf{b}_1 \odot \tilde{\mathbf{k}}, \mathbf{b}_2 \odot \tilde{\mathbf{k}}, \dots, \mathbf{b}_d \odot \tilde{\mathbf{k}}]$  is a linearly independent set.

If it is not linearly independent, there is a column vector  $\mathbf{b}_p \odot \tilde{\mathbf{k}}$  which is a linear combination of other vectors, thus

$$\mathbf{b}_p \odot \tilde{\mathbf{k}} = \sum_{q \neq p} \alpha_q \mathbf{b}_q \odot \tilde{\mathbf{k}} = \left( \sum_{q \neq p} \alpha_q \mathbf{b}_q \right) \odot \tilde{\mathbf{k}} \quad (25)$$

Since  $\tilde{\mathbf{k}}$  has no zeros, we have

$$\mathbf{b}_p = \sum_{q \neq p} \alpha_q \mathbf{b}_q \quad (26)$$

where  $\alpha_q$  is the arbitrary coefficient for vector  $\mathbf{b}_q \odot \tilde{\mathbf{k}}$ . This contradicts that  $B$  has orthogonal columns in (14). Thus  $[\mathbf{b}_1 \odot \tilde{\mathbf{k}}, \mathbf{b}_2 \odot \tilde{\mathbf{k}}, \dots, \mathbf{b}_d \odot \tilde{\mathbf{k}}]$  must be a linearly independent set and span a  $d$ -dimensional space.

### 7.2 Identifiability for Multiple Subunits Model with Same Pooling Weights

*Proof.* We also follow the similar contradiction proof as in single model situation by proving  $\text{rank}(R) = 1$ . Suppose there are multiple solutions,

$$C = \tilde{W} \odot (\tilde{\mathbf{K}} \mathbf{A} \tilde{\mathbf{K}}^H)^\top = \tilde{V} \odot (\tilde{\mathbf{G}} M \tilde{\mathbf{G}}^H)^\top \quad (27)$$

Since both  $\tilde{W}$  and  $\tilde{V}$  are assumed to have no zeros, let  $R := (\tilde{W} / \tilde{V})^\top$ , then we have

$$R \odot \tilde{\mathbf{K}} \mathbf{A} \tilde{\mathbf{K}}^H = \tilde{\mathbf{G}} M \tilde{\mathbf{G}}^H \quad (28)$$

Given that  $R$  could be diagonalized by DFT and

$$\tilde{\mathbf{K}} \mathbf{A} \tilde{\mathbf{K}}^H = \sum_{i=1}^m \alpha_i \tilde{\mathbf{k}}_i \tilde{\mathbf{k}}_i^H, \quad \tilde{\mathbf{G}} M \tilde{\mathbf{G}}^H = \sum_{i=1}^m \beta_i \tilde{\mathbf{g}}_i \tilde{\mathbf{g}}_i^H \quad (29)$$

we can write

$$R \odot \tilde{\mathbf{K}} \mathbf{A} \tilde{\mathbf{K}}^H = \sum_{i=1}^d r_i \mathbf{b}_i \mathbf{b}_i^H \odot \sum_{i=1}^m \alpha_i \tilde{\mathbf{k}}_i \tilde{\mathbf{k}}_i^H \quad (30)$$

$$= \sum_{i=1}^m \sum_{j=1}^d r_j \alpha_i \mathbf{b}_j \mathbf{b}_j^H \odot \tilde{\mathbf{k}}_i \tilde{\mathbf{k}}_i^H \quad (31)$$

$$= \sum_{i=1}^m \sum_{j=1}^d r_j \alpha_i (\mathbf{b}_j \odot \tilde{\mathbf{k}}_i) (\mathbf{b}_j \odot \tilde{\mathbf{k}}_i)^H \quad (32)$$

Expanding  $R \odot \tilde{\mathbf{K}} \mathbf{A} \tilde{\mathbf{K}}^H$  in a more explicit way, we have

$$\begin{aligned} R \odot \tilde{\mathbf{K}} \mathbf{A} \tilde{\mathbf{K}}^H &= r_1 \alpha_1 (\mathbf{b}_1 \odot \tilde{\mathbf{k}}_1) (\mathbf{b}_1 \odot \tilde{\mathbf{k}}_1)^H + r_2 \alpha_1 (\mathbf{b}_2 \odot \tilde{\mathbf{k}}_1) (\mathbf{b}_2 \odot \tilde{\mathbf{k}}_1)^H + \dots + r_d \alpha_1 (\mathbf{b}_d \odot \tilde{\mathbf{k}}_1) (\mathbf{b}_d \odot \tilde{\mathbf{k}}_1)^H + \\ &\quad r_1 \alpha_2 (\mathbf{b}_1 \odot \tilde{\mathbf{k}}_2) (\mathbf{b}_1 \odot \tilde{\mathbf{k}}_2)^H + r_2 \alpha_2 (\mathbf{b}_2 \odot \tilde{\mathbf{k}}_2) (\mathbf{b}_2 \odot \tilde{\mathbf{k}}_2)^H + \dots + r_d \alpha_2 (\mathbf{b}_d \odot \tilde{\mathbf{k}}_2) (\mathbf{b}_d \odot \tilde{\mathbf{k}}_2)^H + \\ &\quad r_1 \alpha_3 (\mathbf{b}_1 \odot \tilde{\mathbf{k}}_3) (\mathbf{b}_1 \odot \tilde{\mathbf{k}}_3)^H + r_2 \alpha_3 (\mathbf{b}_2 \odot \tilde{\mathbf{k}}_3) (\mathbf{b}_2 \odot \tilde{\mathbf{k}}_3)^H + \dots + r_d \alpha_3 (\mathbf{b}_d \odot \tilde{\mathbf{k}}_3) (\mathbf{b}_d \odot \tilde{\mathbf{k}}_3)^H + \\ &\quad \vdots \\ &\quad r_1 \alpha_m (\mathbf{b}_1 \odot \tilde{\mathbf{k}}_m) (\mathbf{b}_1 \odot \tilde{\mathbf{k}}_m)^H + r_2 \alpha_m (\mathbf{b}_2 \odot \tilde{\mathbf{k}}_m) (\mathbf{b}_2 \odot \tilde{\mathbf{k}}_m)^H + \dots + r_d \alpha_m (\mathbf{b}_d \odot \tilde{\mathbf{k}}_m) (\mathbf{b}_d \odot \tilde{\mathbf{k}}_m)^H \end{aligned} \quad (33)$$

Define  $S_i := \text{Span}(\tilde{\mathbf{K}}^{i-1}) = \text{Span}([\mathbf{b}_i \odot \tilde{\mathbf{k}}_1, \mathbf{b}_i \odot \tilde{\mathbf{k}}_2, \dots, \mathbf{b}_i \odot \tilde{\mathbf{k}}_m])$  is a  $m$ -dimensional span for any  $i$ .  $S_1 = \text{Span}(\tilde{\mathbf{K}}) = \text{Span}([\mathbf{b}_1 \odot \tilde{\mathbf{k}}_1, \mathbf{b}_1 \odot \tilde{\mathbf{k}}_2, \dots, \mathbf{b}_1 \odot \tilde{\mathbf{k}}_m])$ .

If  $\text{rank}(R) = 2$  with  $r_i \neq 0$  and  $r_j \neq 0$ ,

$$R \odot \tilde{\mathbf{K}} \mathbf{A} \tilde{\mathbf{K}}^H = r_i \alpha_1 (\mathbf{b}_i \odot \tilde{\mathbf{k}}_1) (\mathbf{b}_i \odot \tilde{\mathbf{k}}_1)^H + r_j \alpha_1 (\mathbf{b}_j \odot \tilde{\mathbf{k}}_1) (\mathbf{b}_j \odot \tilde{\mathbf{k}}_1)^H +$$

$$\begin{aligned}
& r_i \alpha_2(\mathbf{b}_i \odot \tilde{\mathbf{k}}_2)(\mathbf{b}_i \odot \tilde{\mathbf{k}}_2)^H + r_j \alpha_2(\mathbf{b}_j \odot \tilde{\mathbf{k}}_2)(\mathbf{b}_j \odot \tilde{\mathbf{k}}_2)^H + \\
& r_i \alpha_3(\mathbf{b}_i \odot \tilde{\mathbf{k}}_3)(\mathbf{b}_i \odot \tilde{\mathbf{k}}_3)^H + r_j \alpha_3(\mathbf{b}_j \odot \tilde{\mathbf{k}}_3)(\mathbf{b}_j \odot \tilde{\mathbf{k}}_3)^H + \\
& \vdots \\
& r_i \alpha_m(\mathbf{b}_i \odot \tilde{\mathbf{k}}_m)(\mathbf{b}_i \odot \tilde{\mathbf{k}}_m)^H + r_j \alpha_m(\mathbf{b}_j \odot \tilde{\mathbf{k}}_m)(\mathbf{b}_j \odot \tilde{\mathbf{k}}_m)^H
\end{aligned} \tag{34}$$

To satisfy the rank of  $R \odot \tilde{\mathbf{K}} \mathbf{A} \tilde{\mathbf{K}}^H$  to be  $m$ , we have

**Lemma 2.**  $S_i = S_j$  when  $\text{rank}(R) = 2$ .

Since if  $S_i \neq S_j$ , there should be a vector  $\mathbf{b}_j \odot \tilde{\mathbf{k}}_p$  which cannot be represented as a linear combination of  $[\mathbf{b}_i \odot \tilde{\mathbf{k}}_1, \mathbf{b}_i \odot \tilde{\mathbf{k}}_2, \dots, \mathbf{b}_i \odot \tilde{\mathbf{k}}_m]$  (same proof as Lemma 1), then  $\text{rank}(R \odot \tilde{\mathbf{K}} \mathbf{A} \tilde{\mathbf{K}}^H) > m$ . Thus  $S_i$  and  $S_j$  must be the same.

In addition, Lemma 2 implies that

**Corollary 1.** For any  $p$ ,  $S_p = S_{p+\delta}$ , where  $\delta = j - i$ .

We now argue for multiple situations that given Corollary 1,  $\text{rank}(R) = 1$  under the mild Assumption 4.

- If  $\delta \nmid d$  ( $\delta$  does not divide  $d$ ),  $\forall p$ ,  $S_p = S_{p+\delta}$  means  $S_1 = S_2 = \dots = S_d$ . All vectors  $\forall j$ ,  $\mathbf{b}_i \odot \tilde{\mathbf{k}}_j$  lie in the same  $m$ -dimensional subspace. We also know that for any  $i^{\text{th}}$  set,  $[\mathbf{b}_1 \odot \tilde{\mathbf{k}}_i, \mathbf{b}_2 \odot \tilde{\mathbf{k}}_i, \dots, \mathbf{b}_d \odot \tilde{\mathbf{k}}_i]$  are linearly independent (Lemma 1) and span a  $d$ -dimensional space. Thus it induces a contradiction when  $m < d$ . A simpler illustration would be that it is impossible to claim that points in the same 2D space cannot spread out a 3D space, but the contrary holds. Therefore when  $\delta \nmid d$ ,  $\text{rank}(R) < 2 = 1$ .
- If  $\delta \mid d = \omega$ ,  $S_p = S_{p+\delta}$  only indicates that  $S_p = S_{p+\delta} = S_{p+2\delta} = \dots = S_{p+d-\delta}$  ( $\omega$  equal spans).
  - If  $\omega > m$ , this is similar to  $\delta \nmid d$  case. That is,  $[\mathbf{b}_p \odot \tilde{\mathbf{k}}_i, \mathbf{b}_{p+\delta} \odot \tilde{\mathbf{k}}_i, \mathbf{b}_{p+2\delta} \odot \tilde{\mathbf{k}}_i, \dots, \mathbf{b}_{p+d-\delta} \odot \tilde{\mathbf{k}}_i]$  span an  $\omega$ -dimensional subspace which has higher dimension than  $m$ . But they also stay in the same  $m$ -dimensional subspace. Thus there is a contradiction and  $\text{rank}(R) = 1$ .
  - If  $\omega \leq m$ , it is possible that  $R \odot \tilde{\mathbf{K}} \mathbf{A} \tilde{\mathbf{K}}^H$  consists of vectors from  $\mathbf{K}^{i-1}$  and  $\mathbf{K}^{j-1}$  with rank  $m$ . But  $\mathbf{K}^{i-1}$  have the same column span with  $\mathbf{K}^{j-1}$ , because  $S_i = S_j$ . If  $\mathbf{K}^{i-1}$  and  $\mathbf{K}^{j-1}$  share the same column span, then there exists a linear projection coefficient matrix  $\Omega$  satisfying  $\mathbf{K}^{j-1} = \mathbf{K}^{i-1} \Omega$ . Let  $P$  be the permutation matrix from  $\mathbf{K}^{i-1}$  to  $\mathbf{K}^{j-1}$  by shifting rows, namely  $\mathbf{K}^{j-1} = P \mathbf{K}^{i-1}$ . This implies that we need to cook up a  $\mathbf{K}$  whose projection matrix  $\Omega$  for its  $i-1$  shift  $\mathbf{K}^{i-1}$  and  $j-1$  shift  $\mathbf{K}^{j-1}$  satisfies  $\mathbf{K}^{i-1} \Omega = P \mathbf{K}^{i-1}$ . In practice, this condition is barely satisfied. Thus, as long as  $\nexists \Omega$ , such that  $\mathbf{K}^{i-1} \Omega = P \mathbf{K}^{i-1}$ ,  $\mathbf{K}^{i-1}$  and  $\mathbf{K}^{j-1}$  will not share the same span, then  $\text{rank}(R \odot \tilde{\mathbf{K}} \mathbf{A} \tilde{\mathbf{K}}^H) > m$  conflicts with  $\text{rank}(\tilde{\mathbf{G}} M \tilde{\mathbf{G}}^H) \leq m$ . Consequently,  $\text{rank}(R) = 1$ . (This is the interpretation for Assumption 4.)

We can make similar arguments when  $\text{rank}(R) > 2$ , which only introduces more  $m$ -dimensional subspaces compared to  $\text{rank}(R) = 2$  case. In sum, when  $\text{rank}(R) \geq 2$ , there is always a contradiction that  $\text{rank}(R \odot \tilde{\mathbf{K}} \mathbf{A} \tilde{\mathbf{K}}^H) > \text{rank}(\tilde{\mathbf{G}} M \tilde{\mathbf{G}}^H)$  if  $\exists \Omega$  such that  $\mathbf{K}^{i-1} \Omega = P \mathbf{K}^{i-1}$ . Thus, there should be always  $\text{rank}(R) = 1$ .

Setting  $r_i \neq 0$  and all others to be zero, we have

$$r_i (\mathbf{b}_i \mathbf{b}_i^H) \odot \tilde{\mathbf{V}} = \tilde{\mathbf{W}} \tag{35}$$

If we also assume both  $\mathbf{w}$  and  $\mathbf{v}$  are unit vectors to remove scaling vagueness, then  $r_i = 1$ , thus  $\mathbf{w} = \mathbf{v}^{i-1}$ .

We cannot claim the rigorous identifiability of  $\mathbf{K}$  and  $\mathbf{A}$ , but we can claim

$$(\mathbf{b}_i \mathbf{b}_i^H) \odot \tilde{\mathbf{K}} \mathbf{A} \tilde{\mathbf{K}}^H = \tilde{\mathbf{G}} M \tilde{\mathbf{G}}^H \Rightarrow \text{diag}(\mathbf{b}_i) \tilde{\mathbf{K}} \mathbf{A} \tilde{\mathbf{K}}^H \text{diag}(\mathbf{b}_i)^H = \tilde{\mathbf{G}} M \tilde{\mathbf{G}}^H \quad (36)$$

$$\Rightarrow \mathbf{K}^{i-1} \mathbf{A} (\mathbf{K}^{i-1})^\top = \mathbf{G} M \mathbf{G}^\top \quad (37)$$

When  $\mathbf{A}$  has all positive or negative values and  $\mathbf{K}$  has orthogonal columns (Assumption 3 and 5), the identifiability is reduced to the uniqueness of SVD, then  $\mathbf{A}$  and  $\mathbf{K}$  are both identifiable.  $\square$
